# Supplementary material for: Real-World Biologic Adherence, Persistence, and Monotherapy Comparisons in US Patients with Psoriasis: Results from IBM MarketScan® Databases
Source: Springer Nature journal article supplement (doi:10.1007/s12325-022-02155-9), 2022-05-16
Supplement: MOESM1 [file 20417638]

## **SUPPLEMENTARY MATERIALS**

### **Real-World Biologic Adherence, Persistence, and Monotherapy Comparisons in the U.S. Patients with Psoriasis: Results from IBM MarketScan® Databases**

Craig Leonardi, MD<sup>1</sup>; Baojin Zhu, PhD<sup>2</sup>; William N. Malatestinic, Pharm D, MBA<sup>2</sup>; William J. Eastman, MD<sup>2</sup>; Jiaying Guo, MS<sup>2</sup>; Mwangi J. Murage, PhD, MPH<sup>2</sup>; Casey Kar-Chan Choong, MPH<sup>2</sup>; Russel Burge, PhD<sup>2,3</sup>; Andrew Blauvelt, MD, MBA<sup>4</sup>

#### **Corresponding Author:**

Prof. Craig Leonardi

Saint Louis University School of Medicine

1034 South Brentwood Boulevard

Saint Louis, MO 63104

United States of America

[Craig.Leonardi@centralderm.com](mailto:Craig.Leonardi@centralderm.com)

+13147215565

<sup>1</sup>Saint Louis University School of Medicine, Saint Louis, USA

<sup>2</sup>Eli Lilly and Company, Indianapolis, Indiana, USA

<sup>3</sup>University of Cincinnati, Cincinnati, Ohio, USA

<sup>4</sup>Oregon Medical Research Center, Portland, USA

**Email address and phone number for each author:**

| Author                   | Email                               | Phone           |
|--------------------------|-------------------------------------|-----------------|
| Craig Leonardi           | Craig.Leonardi@centralderm.com      | +1 314-721-5565 |
| Baojin Zhu               | zhu_baojin@lilly.com                | +1 317-225-6799 |
| William N. Malatestinic  | malatestinic_william_n@lilly.com    | +1 317-997-2005 |
| William J. Eastman       | eastman_william_j@lilly.com         | +1 317-460-5409 |
| Jiaying Guo              | guo_jiaying@lilly.com               | +1 317-433-4445 |
| Mwangi J. Murage         | murage_mwangi_james@lilly.com       | +1 317-460-3619 |
| Casey Kar-Chan<br>Choong | choong_kar-chan@lilly.com           | +1 317-430-8648 |
| Russel Burge             | burge_russel_thomas@lilly.com       | +1 317-225-9383 |
| Andrew Blauvelt          | ablauvelt@oregonmedicalresearch.com | +1 503-245-1525 |

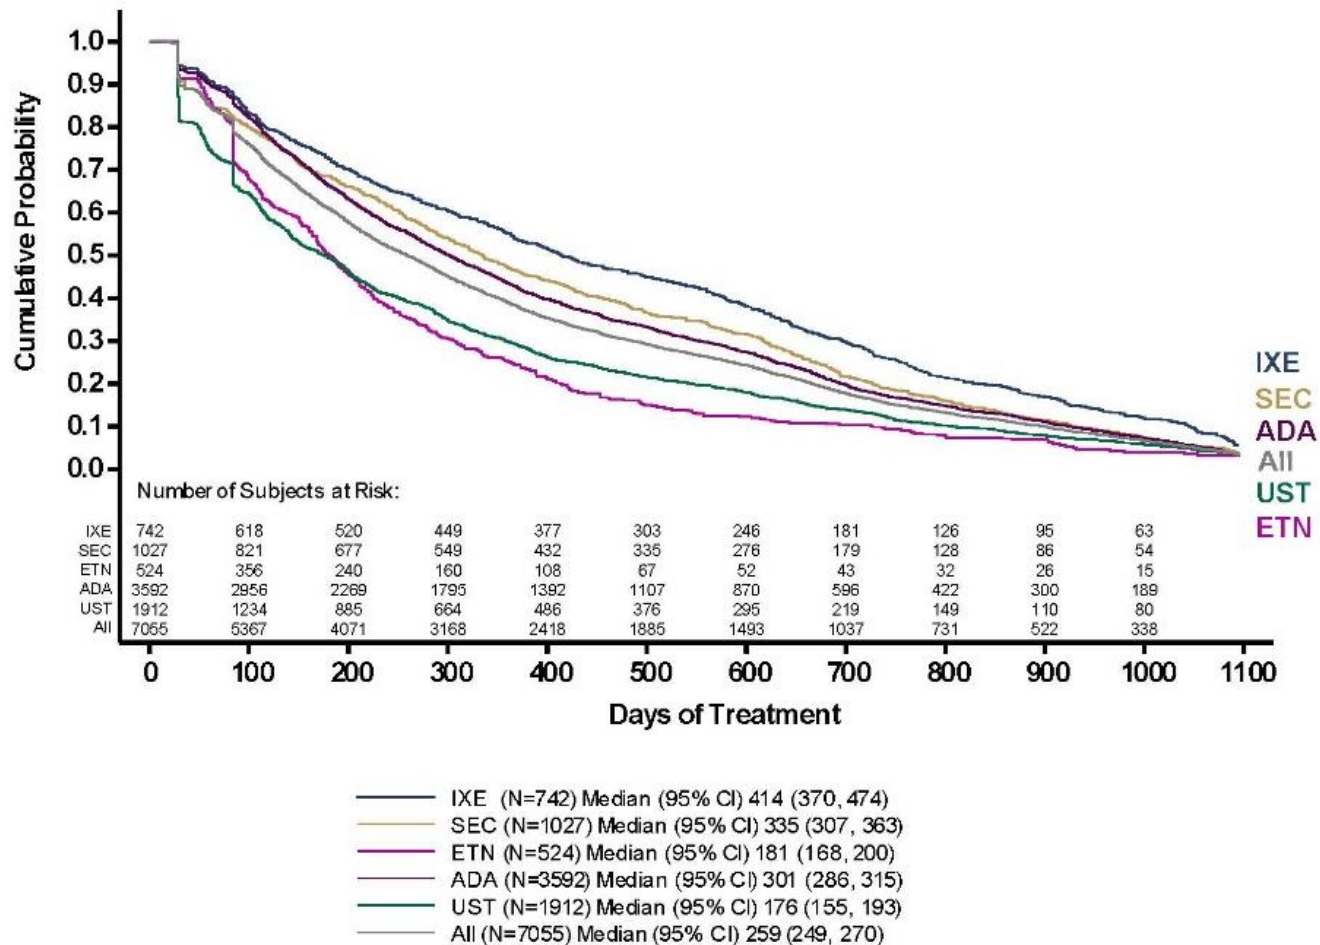

**Supplementary Figure 1. Time to discontinue the index biologic  $\geq 1$ -year period.** Days to discontinue the index biologics in the minimum 1-year follow-up and maximum 3-years follow-up period of IXE, all other biologics, ADA, ETN, SEC, and UST. Observed data are presented. All Includes SEC, UST, ADA, and ETN. ADA=adalimumab; CI=confidence interval; ETN=etanercept; IXE=ixekizumab; SEC=secukinumab; UST=ustekinumab.
